# Supplementary material for: Physicochemical Characterization, Antioxidant, and Proliferative Activity of Colombian Propolis Extracts: A Comparative Study
Source: MDPI journal article supplement (doi:10.3390/molecules29071643), 2024-04-06
Supplement: s1 [file s1]

# Physicochemical Characterization, Antioxidant, and Proliferative Activity of Colombian Propolis Extracts: A Comparative Study

Diana Marcela Buitrago <sup>1\*</sup>, Sandra J. Perdomo <sup>2</sup>, Francisco Arturo Silva <sup>3</sup>, Willy Cely-Veloza <sup>4,5</sup>, Gloria Inés Lafaurie <sup>1\*</sup>

## Supplementary Material

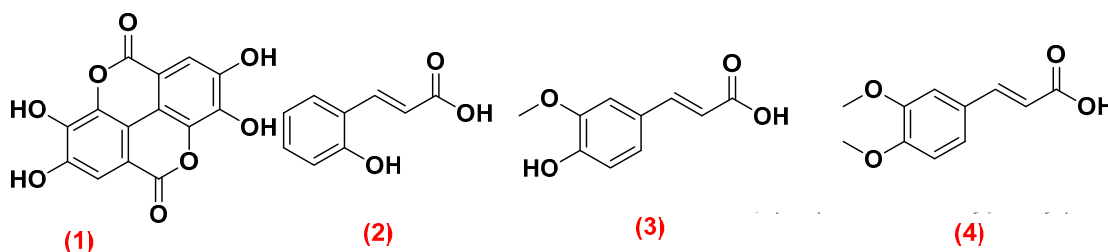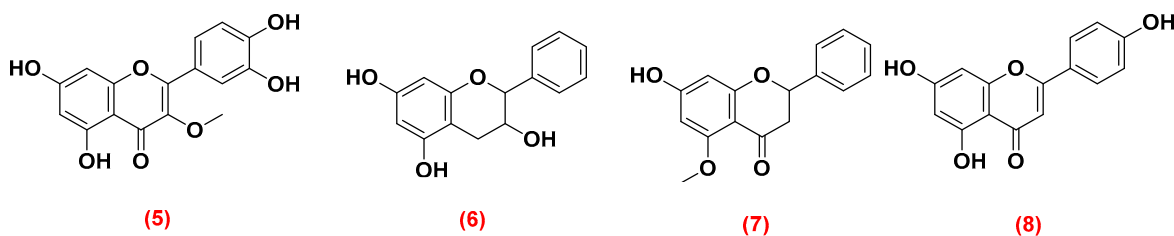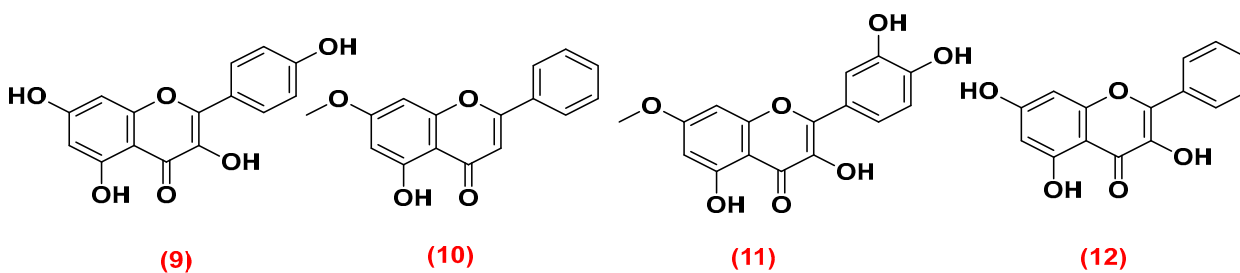

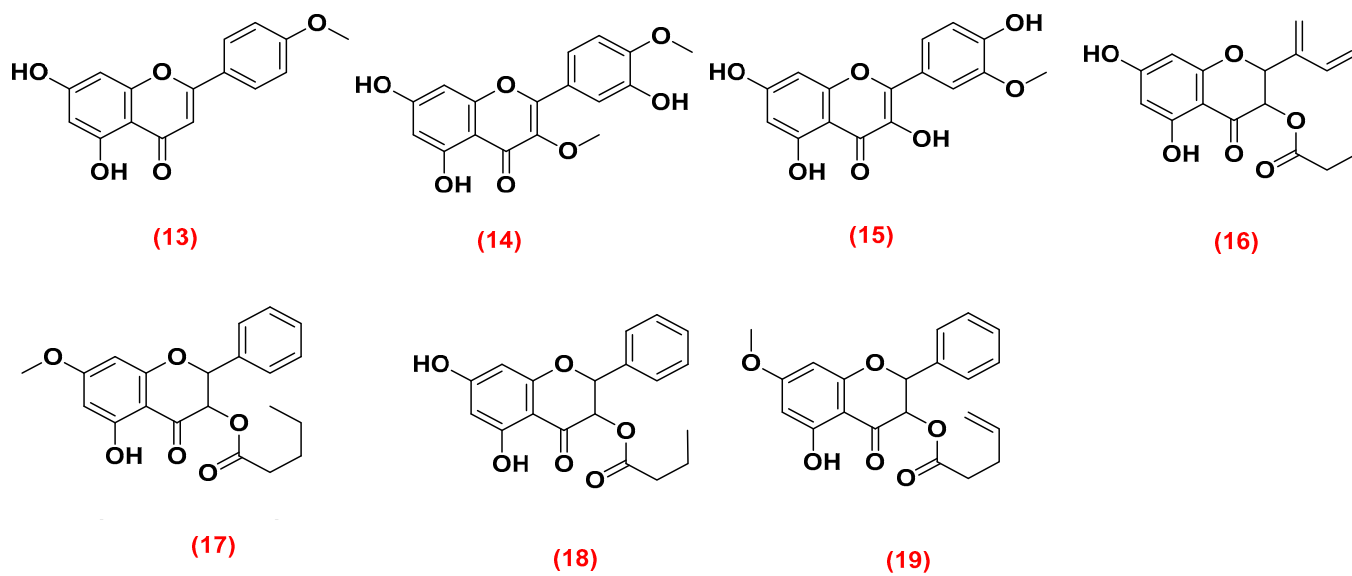

**Figure S1.** Compounds 1–19 found in Colombian propolis extracts.
